# Supplementary material
Source: Springer Nature journal article supplement (https://www.springermedizin.de/resource/supplementary/13063_2009_412_MOESM1_ESM.pdf/9618134)
Supplement: MOESM1 [file 9618134]

**PERSEUS Workhorse (WH)****PERSEUS Small Vessel (SV)****Key Inclusion Criteria**

- Subjects  $\geq 18$  years old
- Documented stable or unstable angina pectoris, or documented silent ischemia
- Left ventricular ejection fraction  $\geq 30\%$
- De novo target lesion in a native coronary artery with angiographic diameter stenosis  $\geq 50\%$ , coverable by a single study stent

**Reference Vessel Diameter** $\geq 2.75\text{mm}$  to  $\leq 4.0\text{mm}$  $\geq 2.25\text{mm}$  to  $< 2.75\text{mm}$ **Cumulative Target Lesion Length** $\leq 28\text{mm}$  $\leq 20\text{mm}$ **Dual Antiplatelet Therapy**

- Mandatory loading dose of  $\geq 300\text{ mg p.o.}$  Clopidogrel (600 mg recommended) or 500 mg p.o. ticlopidine
- Mandated compliance with current ACC/AHA/SCAI Guidelines for PCI for patients treated with drug-eluting stents
- Aspirin (ASA) mandated concomitantly with clopidogrel or ticlopidine; recommended indefinitely

**Enrollment**

90 Clinical Sites

28 Clinical Sites

**N=1264****N=224****Randomization**

3:1

**Single Arm**

**Treatment Group:**  
TAXUS Element  
Paclitaxel-Eluting Stent

**Control Group:**  
TAXUS Express  
Paclitaxel-Eluting Stent

**Treatment Group:**  
TAXUS Element  
Paclitaxel-Eluting Stent

**Control Group:**  
Matched Historical  
Bare Metal Express  
(N=125)

**Clinical Follow-Up**

30 days, 9 months, 12 months, 18 months, 2 years, 3 years, 4 years, 5 years

**Angiographic Follow-Up**

9 Months

330-Subject Randomized  
Angiographic Subset

9 Months

All Subjects

**Primary Endpoint**

12-Month Target Lesion Failure

9-Month In-Stent Late Loss

**Secondary Endpoint**

9-Month In-Segment % Diameter Stenosis

12-Month Target Lesion Failure
